# Supplementary material
Source: PubMed Central journal article supplement (PMC4078793)
Supplement: NIHMS586270-supplement-1.pdf [file NIHMS586270-supplement-1.pdf]

Supplemental figure 1

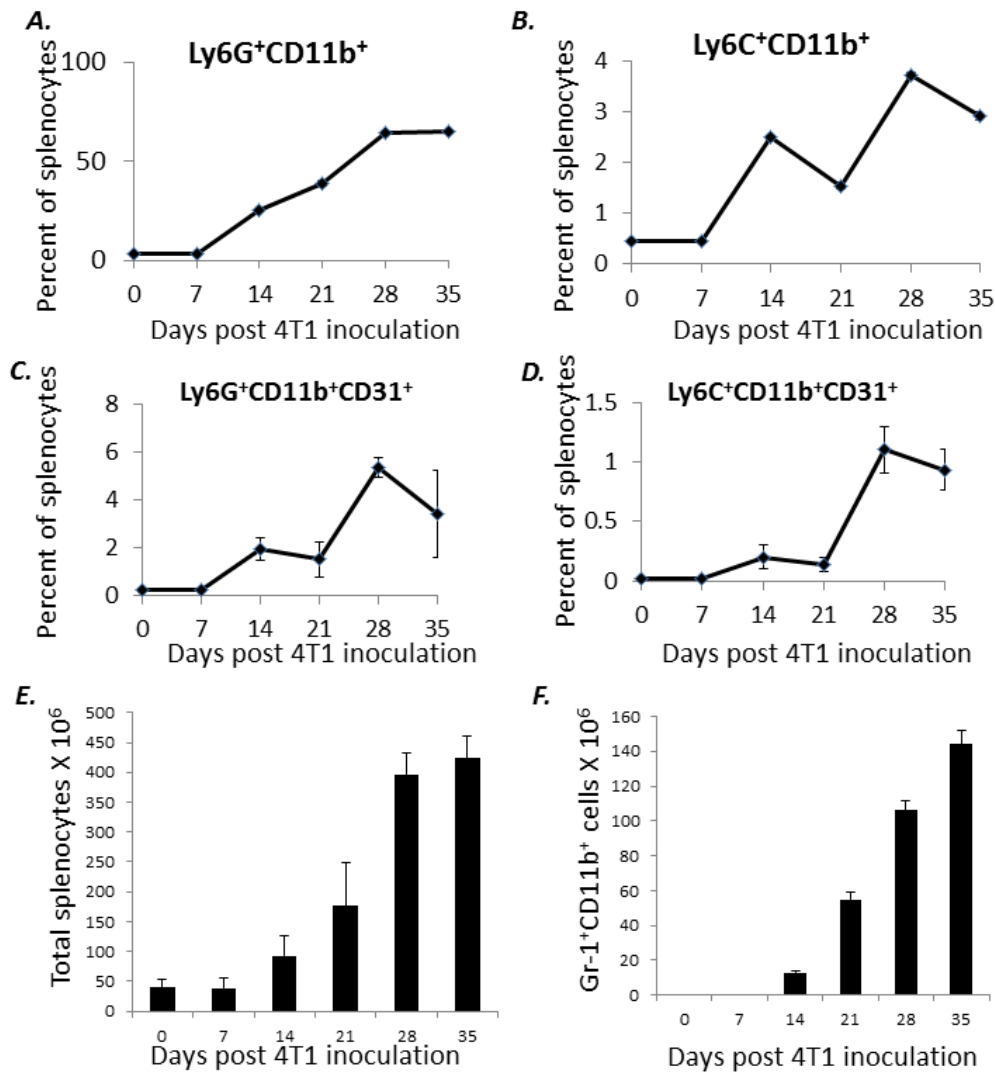

**Supplemental Figure 1. Phenotypic characterization of 4T1 mammary tumor model.**

Splenocytes were harvested from 4T1 bearing animals at 7 day intervals following 4T1 inoculation and phenotyped via flow cytometry for percentages of (A) Ly6G<sup>+</sup>CD11b<sup>+</sup>, (B) Ly6C<sup>+</sup>CD11b<sup>+</sup>, (C) Ly6G<sup>+</sup>CD11b<sup>+</sup>CD31<sup>+</sup>, and (D) Ly6C<sup>+</sup>CD11b<sup>+</sup>CD31<sup>+</sup> cells. In addition, total (E) splenocyte and (F) Gr-1<sup>+</sup>CD11b<sup>+</sup> cell numbers were obtained.

Supplemental figure 2

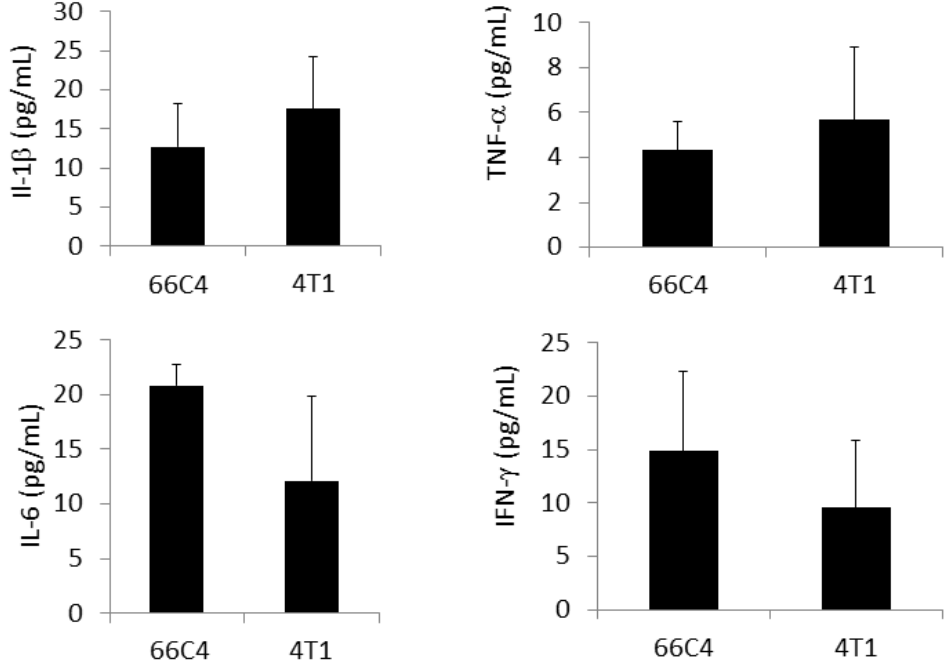

**Supplemental Figure 2.** Serum concentrations of IL-1β, TNF-α, IL6 and IFN-γ from day 28 post 4T1 inoculation animals and day 35 post 66C4 bearing animals were determined via luminex assay.
